# Supplementary material
Source: publisher site journal article supplement (https://www.dovepress.com/article/380194)
Supplement: Supplementary file 1 [file get_supplementary_file.php]

| **Supplementary Table 1. Co-linearity analysis of Baseline Variables and Lg HsCRP** | | | | | | | | |
| --- | --- | --- | --- | --- | --- | --- | --- | --- |
|  | **Unstandardized coefficients** | |  | **standardized coefficients** | **t** | **Sig.** | **Collinearity statistics** | |
| **Variables** | **B** | **Std.error** |  | **Beta** |  |  | **Tolerance** | **VIF** |
| **(Constant)** | -2.42 | 2.19 |  |  | -1.11 | 0.283 |  |  |
| ***Demographic characteristics*** |  |  |  |  |  |  |  |  |
| Age | -0.01 | 0.02 |  | -0.07 | -0.35 | 0.731 | 0.20 | 5.01 |
| Male | -0.45 | 0.44 |  | -0.23 | -1.02 | 0.320 | 0.15 | 6.54 |
| CCS | 0.21 | 0.22 |  | 0.15 | 0.95 | 0.354 | 0.30 | 3.34 |
| ***Coexisting conditions*** |  |  |  |  |  |  |  |  |
| Hypertension | 0.38 | 0.23 |  | 0.27 | 1.65 | 0.115 | 0.29 | 3.43 |
| Dyslipidemia | 0.15 | 0.23 |  | 0.10 | 0.65 | 0.523 | 0.30 | 3.36 |
| Diabetes Mellitus | -0.04 | 0.28 |  | -0.03 | -0.13 | 0.896 | 0.20 | 4.96 |
| Renal Dysfunction | 0.36 | 0.80 |  | 0.10 | 0.45 | 0.655 | 0.16 | 6.11 |
| Ever Smoker | 0.31 | 0.32 |  | 0.21 | 0.96 | 0.347 | 0.17 | 6.04 |
| Current Smoker | 0.04 | 0.27 |  | 0.03 | 0.17 | 0.870 | 0.19 | 5.26 |
| Cerebrovascular Diseases | 0.29 | 0.36 |  | 0.13 | 0.81 | 0.430 | 0.29 | 3.46 |
| Previous Myocardial Infarction | -0.02 | 0.35 |  | -0.01 | -0.06 | 0.955 | 0.26 | 3.81 |
| Peripheral Vascular Diseases | -0.76 | 0.45 |  | -0.25 | -1.67 | 0.111 | 0.35 | 2.88 |
| ***Lab test*** |  |  |  |  |  |  |  |  |
| TG | -0.01 | 0.20 |  | -0.01 | -0.04 | 0.972 | 0.14 | 7.19 |
| TC | -1.87 | 0.86 |  | -2.71 | -2.17 | 0.043* | 0.00 | 201.01 |
| HDL-C | 0.90 | 0.75 |  | 0.35 | 1.20 | 0.244 | 0.09 | 10.79 |
| LDL-C | 2.29 | 0.98 |  | 2.57 | 2.33 | 0.031* | 0.01 | 157.89 |
| Lp(a) | 0.00 | 0.00 |  | -0.11 | -0.77 | 0.451 | 0.36 | 2.78 |
| Urine acid | 0.00 | 0.00 |  | 0.08 | 0.53 | 0.601 | 0.33 | 3.03 |
| HbA1C | 0.13 | 0.09 |  | 0.23 | 1.46 | 0.161 | 0.30 | 3.28 |
| White blood cell | 1.07 | 0.54 |  | 3.67 | 1.96 | 0.064 | 0.00 | 452.90 |
| Neutrophil | -1.00 | 0.56 |  | -3.24 | -1.78 | 0.091 | 0.00 | 430.10 |
| Lymphocyte | -1.34 | 0.68 |  | -1.30 | -1.96 | 0.065 | 0.02 | 57.18 |
| Creatine | 0.01 | 0.01 |  | 0.17 | 0.75 | 0.461 | 0.16 | 6.28 |
| LVEF | -0.02 | 0.01 |  | -0.30 | -1.87 | 0.078 | 0.30 | 3.29 |
| ***Angiographic and Procedural details*** | |  |  |  |  |  |  |  |
| Left Main involved | -0.67 | 0.38 |  | -0.25 | -1.78 | 0.091 | 0.39 | 2.59 |
| LAD involved | -0.11 | 0.22 |  | -0.08 | -0.50 | 0.626 | 0.31 | 3.26 |
| RCA involved | -0.39 | 0.22 |  | -0.29 | -1.74 | 0.098 | 0.29 | 3.48 |
| LCX involved | -0.02 | 0.30 |  | -0.01 | -0.05 | 0.960 | 0.17 | 6.02 |
| TVD | 0.12 | 0.75 |  | 0.02 | 0.16 | 0.876 | 0.37 | 2.71 |
| ***Pulmonary Function Test*** |  |  |  |  |  |  |  |  |
| FEV1/FVC | 0.05 | 0.03 |  | 0.55 | 1.84 | 0.081 | 0.09 | 11.57 |
| FEV1%pred | 0.00 | 0.01 |  | 0.12 | 0.43 | 0.671 | 0.10 | 10.28 |
| GOLD level | 0.03 | 0.32 |  | 0.03 | 0.11 | 0.917 | 0.09 | 11.66 |
| ***Medicine at discharge*** |  |  |  |  |  |  |  |  |
| β-blocker | -0.25 | 0.22 |  | -0.19 | -1.16 | 0.261 | 0.29 | 3.39 |
| ACEI/ARB | 0.25 | 0.28 |  | 0.15 | 0.89 | 0.386 | 0.28 | 3.55 |
| Statin | -0.30 | 0.19 |  | -0.22 | -1.58 | 0.130 | 0.39 | 2.55 |
| DAPT | -0.87 | 0.36 |  | -0.59 | -2.40 | 0.027* | 0.13 | 7.85 |
| Bronchiodialator | 0.56 | 0.36 |  | 0.42 | 1.57 | 0.133 | 0.11 | 9.14 |
| Inhaled Glucocorticoid | 0.66 | 0.49 |  | 0.36 | 1.36 | 0.190 | 0.11 | 8.94 |
| *: p < 0.05 |  |  |  |  |  |  |  |  |
| LgHsCRP, log10(high-sensitivity C reaction protein); CAD, Coronary Artery Disease; CCS, chronic coronary syndrome; CABG, coronary artery bypass graft ; PCI, percutaneous coronary intervention ; TG, triglycerides; TC, total cholesterol; HDL-C, high-density lipoprotein cholesterol; LDL-C, low-density lipoprotein cholesterol; Lp(a), lipoprotein a; HbA1C, hemoglobin A1C; LVEF, left ventricular eject fraction; LAD, left anterior descending; RCA, right coronary artery; LCX, left circumflex; TVD, three vessel disease; FEV1, forced expiratory volume in one second; FVC, forced vital capacity; GOLD, global initiative for chronic obstructive disease; ACEI, angiotensin converting enzyme inhibitors; ARB, angiotensin receptor blockers; DAPT, dual antiplatelet therapy. | | | | | | | | |
|  |

| **Supplementary Table 2. Univariate and Multivariate Analysis for HsCRP Predicting the Occurrence of MACEs within 4 years after PCI** | | | | | | |  |
| --- | --- | --- | --- | --- | --- | --- | --- |
|  | **Univariate Analysis** | | |  | **Multivariate Analysis** | | |
| **Variables** | **HR** | **95%CI** | **P value** |  | **HR** | **95%CI** | **P value** |
| **HsCRP** |  |  |  |  |  |  |  |
| Group A, HsCRP < 1.70 mg/l | ref | ref | ref |  | ref | ref | ref |
| Group B, HsCRP >= 1.70 mg/l | 2.47 | 1.22 - 5.00 | 0.012* |  | 2.26 | 1.03 - 4.97 | 0.043* |
| **TC** | 1.38 | 1.05 - 1.81 | 0.023* |  | 2.00 | 0.80 - 4.98 | 0.136 |
| **TG** | 1.19 | 0.92 - 1.55 | 0.191 |  | 0.88 | 0.55 - 1.40 | 0.578 |
| **HDL-C** | 1.12 | 0.32 - 3.93 | 0.858 |  | 0.71 | 0.13 - 3.87 | 0.690 |
| **LDL-C** | 1.35 | 0.96 - 1.90 | 0.088 |  | 0.63 | 0.25 - 1.63 | 0.340 |
| **White blood cell** | 1.07 | 0.99 - 1.16 | 0.069 |  | 1.03 | 0.71 - 1.49 | 0.878 |
| **Neutrophil** | 1.07 | 0.99 - 1.16 | 0.095 |  | 0.97 | 0.66 - 1.42 | 0.875 |
| Age | 1.00 | 0.97 - 1.03 | 0.842 |  | - | - | - |
| Male | 0.66 | 0.30 - 1.45 | 0.302 |  | - | - | - |
| CCS | 1.12 | 0.56 - 2.24 | 0.752 |  | - | - | - |
| Hypertension | 1.23 | 0.64 - 2.38 | 0.532 |  | - | - | - |
| Dyslipidemia | 0.85 | 0.43 - 1.67 | 0.634 |  | - | - | - |
| Diabetes Mellitus | 1.35 | 0.67 - 2.70 | 0.398 |  | - | - | - |
| Renal Dysfunction | 1.34 | 0.41 - 4.38 | 0.626 |  | - | - | - |
| Ever Smoker | 1.50 | 0.73 - 3.11 | 0.271 |  | - | - | - |
| Current Smoker | 1.35 | 0.71 - 2.60 | 0.361 |  | - | - | - |
| Cerebrovascular Diseases | 1.18 | 0.42 - 3.33 | 0.760 |  | - | - | - |
| Previous Myocardial Infarction | 1.80 | 0.55 - 5.87 | 0.330 |  | - | - | - |
| Peripheral Vascular Diseases | 1.75 | 0.42 - 7.29 | 0.444 |  | - | - | - |
| Lp(a) | 1.00 | 0.99 - 1.00 | 0.921 |  | - | - | - |
| Urine acid | 1.00 | 0.99 - 1.00 | 0.863 |  | - | - | - |
| HbA1C | 1.13 | 0.89 - 1.42 | 0.323 |  | - | - | - |
| Lymphocyte | 1.15 | 0.80 - 1.64 | 0.451 |  | - | - | - |
| Creatine | 1.00 | 0.99 - 1.02 | 0.707 |  | - | - | - |
| LVEF | 1.01 | 0.96 - 1.06 | 0.741 |  | - | - | - |
| FEV1/FVC | 1.03 | 0.95 - 1.12 | 0.477 |  | - | - | - |
| FEV1%pred | 1.00 | 0.97 - 1.04 | 0.882 |  | - | - | - |
| GOLD level | 1.09 | 0.80 - 1.49 | 0.587 |  | - | - | - |
| β-blocker | 0.93 | 0.48 - 1.78 | 0.823 |  | - | - | - |
| ACEI/ARB | 1.09 | 0.50 - 2.39 | 0.827 |  | - | - | - |
| Statin | 0.86 | 0.45 - 1.63 | 0.637 |  | - | - | - |
| DAPT | 0.90 | 0.45 - 1.79 | 0.764 |  | - | - | - |
| Bronchiodialator | 1.10 | 0.56 - 2.16 | 0.786 |  | - | - | - |
| Inhaled Glucocorticoid | 1.42 | 0.69 - 2.94 | 0.343 |  | - | - | - |
| *: p ＜0.05 |  |  |  |  |  |  |  |
| HsCRP, high-sensitivity C reaction protein; CAD, Coronary Artery Disease; CCS, chronic coronary syndrome; CABG, coronary artery bypass graft ; PCI, percutaneous coronary intervention ; TG, triglycerides; TC, total cholesterol; HDL-C, high-density lipoprotein cholesterol; LDL-C, low-density lipoprotein cholesterol; Lp(a), lipoprotein a; HbA1C, hemoglobin A1C; LVEF, left ventricular eject fraction; LAD, left anterior descending; RCA, right coronary artery; LCX, left circumflex; TVD, three vessel disease; FEV1, forced expiratory volume in one second; FVC, forced vital capacity; GOLD, global initiative for chronic obstructive disease; ACEI, angiotensin converting enzyme inhibitors; ARB, angiotensin receptor blockers; DAPT, dual antiplatelet therapy; HR, hazard ratio; CI, confidence interval. Confounding factors used for multivariate COX regression model: HsCRP, TG, TC, HDL-C, LDL-C, White blood cell, Neutrophil. | | | | | | | |
|  |
